# Supplementary material for: A Content Analysis of 100 Qualitative Health Research Articles to Examine Researcher-Participant Relationships and Implications for Data Sharing
Source: PubMed Central journal article supplement — Int J Qual Methods. Author manuscript; Available in PMC 2024 Feb 23. (PMC10888521; doi:10.1177/16094069221105074), 2022-05-31
Supplement: NIHMS1912558-supplement-Supplemental_Appendix_1.pdf [file NIHMS1912558-supplement-Supplemental_Appendix_1.pdf]

## Appendix 1. Articles Reviewed in this Study.

Abdi, B., Okal, J., Serour, G., & Temmerman, M. (2020). "Children are a blessing from God" – a qualitative study exploring the socio-cultural factors influencing contraceptive use in two Muslim communities in Kenya. *Reproductive Health*, 17(1), 44. <https://doi.org/10.1186/s12978-020-0898-z>

Agarwal, S. D., Pabo, E., Rozenblum, R., & Sherritt, K. M. (2020). Professional Dissonance and Burnout in Primary Care: A Qualitative Study. *JAMA Internal Medicine*, 180(3), 395-401.

<https://doi.org/10.1001/jamainternmed.2019.6326>

Ahmad, F., Boeckmann, M., Khan, Z., Zeeb, H., Khan, M. N., Ullah, S., Dreger, S., Ul Haq, Z., & Forberger, S. (2020). Implementing smokeless tobacco control policy in Pakistan: a qualitative study among Naswar supply chain actors. *Tobacco Control*. <https://doi.org/10.1136/tobaccocontrol-2020-055748>

Ahonsi, B., Fuseini, K., Nai, D., Goldson, E., Owusu, S., Ndifuna, I., Humes, I., & Tapsoba, P. L. (2019). Child marriage in Ghana: evidence from a multi-method study. *BMC Womens Health*, 19(1), 126.

<https://doi.org/10.1186/s12905-019-0823-1>

Aloweni, F., Doshi, K., Fook-Chong, S., Malhotra, R., & Østbye, T. (2019). The types of caregiving reactions experienced by the older spouse caregivers. *Journal of Clinical Nursing*, 28(23-24), 4538-4548. <https://doi.org/10.1111/jocn.15044>

Alpren, C., Dawson, E. L., John, B., Cranston, K., Panneer, N., Fukuda, H. D., Roosevelt, K., Klevens, R. M., Bryant, J., Peters, P. J., Lyss, S. B., Switzer, W. M., Burrage, A., Murray, A., Agnew-Brune, C., Stiles, T., McClung, P., Campbell, E. M., Breen, C., & Buchacz, K. (2020). Opioid Use Fueling HIV Transmission in an Urban Setting: An Outbreak of HIV Infection Among People Who Inject Drugs—Massachusetts, 2015–2018. *American Journal of Public Health*, 110(1), 37-44.

<https://doi.org/10.2105/ajph.2019.305366>

Andrade, L., Moran, K., Snelling, S. J., Malaviarachchi, D., Beyers, J., Near, K., & Randall Simpson, J. (2020). Beyond BMI: a feasibility study implementing NutriSTEP in primary care practices using electronic medical records (EMRs). *Health Promotion and Chronic Disease Prevention in Canada*, 40(1), 1-10. <https://doi.org/10.24095/hpcdp.40.1.01>

Armstrong, S., Langlois, A., Siriwardena, N., & Quinn, T. (2019). Ethical considerations in prehospital ambulance based research: qualitative interview study of expert informants. *BMC Medical Ethics*, 20(1), 88. <https://doi.org/10.1186/s12910-019-0425-3>

Bagherian, S., Sharif, F., Zarshenas, L., Torabizadeh, C., Abbaszadeh, A., & Izadpanahi, P. (2020). Cancer patients' perspectives on dignity in care. *Nursing Ethics*, 27(1), 127-140. <https://doi.org/10.1177/0969733019845126>

Baker, J. A., Canvin, K., & Berzins, K. (2019). The relationship between workforce characteristics and perception of quality of care in mental health: A qualitative study. *International Journal of Nursing Studies*, 100, 103412. <https://doi.org/10.1016/j.ijnurstu.2019.103412>

Banke-Thomas, A., Maua, J., Madaj, B., Ameh, C., & van den Broek, N. (2020). Perspectives of stakeholders on emergency obstetric care training in Kenya: a qualitative study. *International Health*, 12(1), 11-18. <https://doi.org/10.1093/inthealth/ihz007>

Barnert, E. S., Lopez, N., & Chung, P. J. (2020). Barriers to Health Care for Latino Youths During Community Reentry After Incarceration: Los Angeles County, California, 2016-2018. *American Journal of Public Health*, 110(S1), S63-s70. <https://doi.org/10.2105/ajph.2019.305374>

Besigye, I. K., Onyango, J., Ndoboli, F., Hunt, V., Haq, C., & Namatovu, J. (2019). Roles and challenges of family physicians in Uganda: A qualitative study. *African Journal of Primary Health Care & Family Medicine*, 11(1), e1-e9. <https://doi.org/10.4102/phcfm.v11i1.2009>

Binka, C., Nyarko, S. H., Awusabo-Asare, K., & Doku, D. T. (2019). Barriers to the Uptake of Cervical Cancer Screening and Treatment among Rural Women in Ghana. *Biomed Research International* 2019, 6320938. <https://doi.org/10.1155/2019/6320938>

Blank, M. L., Hoek, J., & Gendall, P. (2020). Roll-your-own smokers' reactions to cessation-efficacy messaging integrated into tobacco packaging design: a sequential mixed-methods study. *Tobacco Control*. <https://doi.org/10.1136/tobaccocontrol-2019-055570>

Bowen, J. L., Ilgen, J. S., Regehr, G., Cate, O. T., Irby, D. M., & O'Brien, B. C. (2019). Reflections From the Rearview Mirror: Internal Medicine Physicians' Reactions to Clinical Feedback After Transitions of Responsibility. *Academic Medicine*, 94(12), 1953-1960. <https://doi.org/10.1097/acm.0000000000002831>

Brown, J., Zhu, M., Moran, M., Hoe, C., Frejas, F., & Cohen, J. E. (2020). 'It has candy. You need to press on it': young adults' perceptions of flavoured cigarettes in the Philippines. *Tobacco Control*. <https://doi.org/10.1136/tobaccocontrol-2019-055524>

Burbridge, C., Randall, J. A., Lawson, J., Symonds, T., Dearden, L., Lopez-Gitlitz, A., Espina, B., & McQuarrie, K. (2020). Understanding symptomatic experience, impact, and emotional response in recently diagnosed metastatic castration-resistant prostate cancer: a qualitative study. *Supportive Care in Cancer*, 28(7), 3093-3101. <https://doi.org/10.1007/s00520-019-05079-3>

Byhoff, E., De Marchis, E. H., Hessler, D., Fichtenberg, C., Adler, N., Cohen, A. J., Doran, K. M., de Cuba, S. E., Fleeger, E. W., Gavin, N., Huebschmann, A. G., Tessler Lindau, S., Tung, E. L., Raven, M., Jepson, S., Johnson, W., Olson, A. L., Sandel, M., & Gottlieb, L. M. (2019). Part II: A Qualitative Study of Social Risk Screening Acceptability in Patients and Caregivers. *American Journal of Preventive Medicine*, 57(6 Suppl 1), S38-s46. <https://doi.org/10.1016/j.amepre.2019.07.016>

Byhoff, E., & Taylor, L. A. (2019). Massachusetts Community-Based Organization Perspectives on Medicaid Redesign. *American Journal of Preventive Medicine*, 57(6 Suppl 1), S74-s81.

<https://doi.org/10.1016/j.amepre.2019.07.017>

Carvalho, M. L., Barbosa, C. N. S., Bezerra, V. P., Santos, A., Silva, C., Brito, C. M. S., & Figueiredo, M. (2019). Health situation in the perception of elderly widows assisted by primary health care. *Revista Brasileira de Enfermagem*, 72(suppl 2), 199-204. <https://doi.org/10.1590/0034-7167-2018-0549>

Chavez, G., Minkler, M., McDaniel, P. A., Estrada, J., Thayer, R., & Falbe, J. (2019). Retailers' perspectives on selling tobacco in a low-income San Francisco neighbourhood after California's \$2 tobacco tax increase. *Tobacco Control*, 28(6), 657-662. <https://doi.org/10.1136/tobaccocontrol-2018-054575>

Chukwuma, A., Gong, E., Latypova, M., & Fraser-Hurt, N. (2019). Challenges and opportunities in the continuity of care for hypertension: a mixed-methods study embedded in primary health care intervention in Tajikistan. *BMC Health Services Research*, 19. <https://doi.org/10.1186/s12913-019-4779-5>

Crape, B. L., Yakhiyayeva, T., Kadyrzhanuly, K., Gusmanov, A., & Sadykova, D. (2020). Hookah venue employees' knowledge and perceptions of hookah tobacco smoking. *Tobacco Control*.

<https://doi.org/10.1136/tobaccocontrol-2019-055461>

Davies, A. R., Homolova, L., Grey, C. N. B., & Bellis, M. A. (2019). Health and mass unemployment events-developing a framework for preparedness and response. *Journal of Public Health (Oxf)*, 41(4), 665-673. <https://doi.org/10.1093/pubmed/fdy174>

Devik, S. A., Enmarker, I., & Hellzen, O. (2020). Nurses' experiences of compassion when giving palliative care at home. *Nursing Ethics*, 27(1), 194-205. <https://doi.org/10.1177/0969733019839218>

Dogan, E. I. K., Raustøl, A., & Terragni, L. (2020). Student nurses' views of right to food of older adults in care homes. *Nursing Ethics*, 27(3), 754-766. <https://doi.org/10.1177/0969733019884614>

Doubleday, A., Errett, N. A., Ebi, K. L., & Hess, J. J. (2020). Indicators to Guide and Monitor Climate Change Adaptation in the US Pacific Northwest. *American Journal of Public Health*, 110(2), 180-188. <https://doi.org/10.2105/ajph.2019.305403>

Enoch, A. J., English, M., McGivern, G., & Shepperd, S. (2019). Variability in the use of pulse oximeters with children in Kenyan hospitals: A mixed-methods analysis. *PLoS Medicine*, 16(12), e1002987. <https://doi.org/10.1371/journal.pmed.1002987>

Feller, K., & Berendonk, C. (2020). Identity matters - perceptions of inter-professional feedback in the context of workplace-based assessment in Diabetology training: a qualitative study. *BMC Medical Education*, 20(1), 33. <https://doi.org/10.1186/s12909-020-1932-0>

Fernandes, H., Brandão, M. B., Castilho-Júnior, R. A., Hino, P., & Ohara, C. (2020). The care for the persistent family aggressor in the perception of nursing students. *Revista Latin America Enfermagem*, 28, e3287. <https://doi.org/10.1590/1518-8345.3991.3287>

Fulford, H., McSwiggan, L., Kroll, T., & MacGillivray, S. (2019). Exploring the use of mobile information and communication technologies by people with mood disorders. *International Journal of Mental Health Nursing*, 28(6), 1268-1277. <https://doi.org/10.1111/inm.12632>

Gysin, S., Sottas, B., Odermatt, M., & Essig, S. (2019). Advanced practice nurses' and general practitioners' first experiences with introducing the advanced practice nurse role to Swiss primary care: a qualitative study. *BMC Family Practice*, 20(1), 163. <https://doi.org/10.1186/s12875-019-1055-z>

Haggart, K., Robertson, L., Blank, M. L., Popova, L., & Hoek, J. (2020). It's Just Steam: a qualitative analysis of New Zealand ENDS users' perceptions of secondhand aerosol. *Tobacco Control*.

<https://doi.org/10.1136/tobaccocontrol-2019-055368>

Honkavuo, L. (2020). Nursing students' perspective on a caring relationship in clinical supervision.

*Nursing Ethics*, 27(5), 1225-1237. <https://doi.org/10.1177/0969733019871695>

Huber-Krum, S., Hackett, K., Senderowicz, L., Pearson, E., Francis, J. M., Siril, H., Ulena, N., & Shah, I.

(2019). Women's Perspectives on Postpartum Intrauterine Devices in Tanzania. *Studies in Family*

*Planning*, 50(4), 317-336. <https://doi.org/10.1111/sifp.12106>

Hunter, K., & Cook, C. (2020). Indigenous nurses' practice realities of cultural safety and socioethical

nursing. *Nursing Ethics*, 27(6), 1472-1483. <https://doi.org/10.1177/0969733020940376>

Isler, J., Sawadogo, N. H., Harling, G., Bärnighausen, T., Adam, M., Kagoné, M., Sié, A., Greuel, M., &

McMahon, S. A. (2019). Iterative Adaptation of a Mobile Nutrition Video-Based Intervention Across

Countries Using Human-Centered Design: Qualitative Study. *JMIR Mhealth Uhealth*, 7(11), e13604.

<https://doi.org/10.2196/13604>

Janssen, R., Engel, N., Esmail, A., Oelofse, S., Krumeich, A., Dheda, K., & Pai, N. P. (2020). Alone But

Supported: A Qualitative Study of an HIV Self-testing App in an Observational Cohort Study in South

Africa. *AIDS and Behavior*, 24(2), 467-474. <https://doi.org/10.1007/s10461-019-02516-6>

Jensen, A. M., Pedersen, B. D., Wilson, R. L., Bang Olsen, R., & Hounsgaard, L. (2019). Nurses'

experiences of delivering acute orthopaedic care to patients with dementia. *International Journal of*

*Older People Nursing*, 14(4), e12271. <https://doi.org/10.1111/opn.12271>

Kerrigan, D., Sanchez Karver, T., Muraleetharan, O., Savage, V., Mbwambo, J., Donastorg, Y.,

Likindikoki, S., Perez, M., Gomez, H., Mantsios, A., Murray, M., Wilson Beckham, S., Davis, W., Galai,

N., & Barrington, C.. (2020). "A dream come true": Perspectives on long-acting injectable

antiretroviral therapy among female sex workers living with HIV from the Dominican Republic and Tanzania. *PLoS One*, 15(6), e0234666. <https://doi.org/10.1371/journal.pone.0234666>

Kielo, E., Suhonen, R., Salminen, L., & Stolt, M. (2019). Competence areas for registered nurses and podiatrists in chronic wound care, and their role in wound care practice. *Journal of Clinical Nursing*, 28(21-22), 4021-4034. <https://doi.org/10.1111/jocn.14991>

Krupic, F. (2020). The Impact of Religion and Provision of Information on Increasing Knowledge and Changing Attitudes to Organ Donation: An Intervention Study. *Journal of Religion and Health*, 59(4), 2082-2095. <https://doi.org/10.1007/s10943-019-00961-0>

Lai, H. L., Perng, S. J., & Huang, C. Y. (2019). Nursing Students' Perceptions of a Silent Mentor Program in an Anatomy Course. *Anatomical Sciences Education*, 12(6), 627-635. <https://doi.org/10.1002/ase.1863>

Lalla, A. T., Ginsbach, K. F., Penney, N., Shamsudin, A., & Oka, R. (2020). Exploring sources of insecurity for Ethiopian Oromo and Somali women who have given birth in Kakuma Refugee Camp: A Qualitative Study. *PLoS Medicine*, 17(3), e1003066. <https://doi.org/10.1371/journal.pmed.1003066>

Li, A. J., Tabu, C., Shendale, S., Okoth, P. O., Serگون, K., Maree, E., Mugoya, I. K., Machekanyanga, Z., Onuekwusi, I. U., & Ogbuanu, I. U. (2020). Qualitative insights into reasons for missed opportunities for vaccination in Kenyan health facilities. *PLoS One*, 15(3), e0230783. <https://doi.org/10.1371/journal.pone.0230783>

Li, H., Sun, D., Wan, Z., Chen, J., & Sun, J. (2020). The perceptions of older nurses regarding continuing to work in a nursing career after retirement: A qualitative study in two Chinese hospitals of different levels. *International Journal of Nursing Studies*, 105, 103554. <https://doi.org/10.1016/j.ijnurstu.2020.103554>

Lusambili, A. M., Naanyu, V., Wade, T. J., Mossman, L., Mantel, M., Pell, R., Ngetich, A., Mulama, K., Nyaga, L., Obure, J., & Temmerman, M. (2020). Deliver on Your Own: Disrespectful Maternity Care in rural Kenya. *PLoS One*, *15*(1), e0214836. <https://doi.org/10.1371/journal.pone.0214836>

Malâtre-Lansac, A., Engel, C. C., Xenakis, L., Carlasare, L., Blake, K., Vargo, C., Botts, C., Chen, P. G., & Friedberg, M. W. (2020). Factors Influencing Physician Practices' Adoption of Behavioral Health Integration in the United States: A Qualitative Study. *Annals of Internal Medicine*, *173*(2), 92-99. <https://doi.org/10.7326/m20-0132>

Martinsen, E. H., Weimand, B., & Norvoll, R. (2020). Does coercion matter? Supporting young next-of-kin in mental health care. *Nursing Ethics*, *27*(5), 1270-1281. <https://doi.org/10.1177/0969733019871681>

McGuinness, S. L., O'Toole, J., Ayton, D., Giriyan, A., Gaonkar, C. A., Vhaval, R., Cheng, A. C., & Leder, K. (2020). Barriers and Enablers to Intervention Uptake and Health Reporting in a Water Intervention Trial in Rural India: A Qualitative Explanatory Study. *American Journal of Tropical Medicine and Hygiene*, *102*(3), 507-517. <https://doi.org/10.4269/ajtmh.19-0486>

McLeod, K. E., & Norman, K. E. (2020). "I've found it's very meaningful work": Perspectives of physiotherapists providing palliative care in Ontario. *Physiotherapy Research International*, *25*(1), e1802. <https://doi.org/10.1002/pri.1802>

Melody, S. M., Martin-Gall, V. A., & Veitch, M. G. (2020). Why Tasmanian retailers stop selling tobacco and implications for tobacco control. *Tobacco Control*. <https://doi.org/10.1136/tobaccocontrol-2019-055588>

Mishra, D., Spiegel, P. B., Digidiki, V. L., & Winch, P. J. (2020). Interpretation of vulnerability and cumulative disadvantage among unaccompanied adolescent migrants in Greece: A qualitative study. *PLoS Medicine*, *17*(3), e1003087. <https://doi.org/10.1371/journal.pmed.1003087>



Moukarzel, S., Mamas, C., Farhat, A., Abi Abboud, A., & Daly, A. J. (2020). A qualitative examination of barriers against effective medical education and practices related to breastfeeding promotion and support in Lebanon. *Medical Education Online*, 25(1), 1723950.

<https://doi.org/10.1080/10872981.2020.1723950>

Nassery, W., & Landgren, K. (2019). Parents' Experience of Their Sleep and Rest When Admitted to Hospital with Their Ill Child: A Qualitative Study. *Comprehensive Child and Adolescent Nursing*, 42(4), 265-279. <https://doi.org/10.1080/24694193.2018.1528310>

Ng, P. Y., Lau, S. T., Ong, S. F., & S, Y. L. (2019). Singaporean nursing students' perceptions of a career in community nursing. *International Nursing Review*, 66(4), 514-522.

<https://doi.org/10.1111/inr.12528>

Ohayon, J. L., Nost, E., Silk, K., Rakoff, M., & Brody, J. G. (2020). Barriers and opportunities for breast cancer organizations to focus on environmental health and disease prevention: a mixed-methods approach using website analyses, interviews, and focus groups. *Environmental Health*, 19(1), 15.

<https://doi.org/10.1186/s12940-020-0570-7>

Oliveira, V. C., Guimarães, E. A. A., Amaral, G. G., Silva, T. I. M., Fabríz, L. A., & Pinto, I. C. (2020). Acceptance and use of the Information System of the National Immunization Program. *Revista Latin America Enfermagem*, 28, e3307. <https://doi.org/10.1590/1518-8345.3360.3307>

Østengaard, L., Lundh, A., Tjørnhøj-Thomsen, T., Abdi, S., Gelle, M. H. A., Stewart, L. A., Boutron, I., & Hróbjartsson, A. (2020). Influence and management of conflicts of interest in randomised clinical trials: qualitative interview study. *BMJ* 371, m3764. <https://doi.org/10.1136/bmj.m3764>

Palamar, J. J., Acosta, P., Sutherland, R., Shedlin, M. G., & Barratt, M. J. (2019). Adulterants and altruism: A qualitative investigation of "drug checkers" in North America. *International Journal of Drug Policy*, 74, 160-169. <https://doi.org/10.1016/j.drugpo.2019.09.017>

Parker, L., Fabbri, A., Grundy, Q., Mintzes, B., & Bero, L. (2019). "Asset exchange"-interactions between patient groups and pharmaceutical industry: Australian qualitative study. *BMJ*, *367*, l6694.

<https://doi.org/10.1136/bmj.l6694>

Pearce, S., Whelan, J., Kelly, D., & Gibson, F. (2020). Renegotiation of identity in young adults with cancer: A longitudinal narrative study. *International Journal of Nursing Studies*, *102*, 103465.

<https://doi.org/10.1016/j.ijnurstu.2019.103465>

Qvist, N., Bergström, I., Åkerstedt, T., Persson, J., Konradsen, H., & Forss, A. (2019). From being restrained to recapturing vitality: non-western immigrant women's experiences of undergoing vitamin D treatment after childbirth. *International Journal of Qualitative Studies on Health and Well-being*, *14*(1), 1632111.

<https://doi.org/10.1080/17482631.2019.1632111>

Rashid, A., Iguchi, Y., & Afiqah, S. N. (2020). Medicalization of female genital cutting in Malaysia: A mixed methods study. *PLoS Medicine*, *17*(10), e1003303.

<https://doi.org/10.1371/journal.pmed.1003303>

Ray-Barruel, G., Woods, C., Larsen, E. N., Marsh, N., Ullman, A. J., & Rickard, C. M. (2019). Nurses' decision-making about intravenous administration set replacement: A qualitative study. *Journal of Clinical Nursing*, *28*(21-22), 3786-3795.

<https://doi.org/10.1111/jocn.14979>

Reiter, K., Ventura, J., Lovell, D., Augustine, D., Barragan, M., Blair, T., Chesnut, K., Dashtgard, P., Gonzalez, G., Pifer, N., & Strong, J. (2020). Psychological Distress in Solitary Confinement: Symptoms, Severity, and Prevalence in the United States, 2017-2018. *American Journal of Public Health*, *110*(S1), S56-s62.

<https://doi.org/10.2105/ajph.2019.305375>

Roos, A., Skaug, E. A., Grøndahl, V. A., & Helgesen, A. K. (2020). Trading company for privacy: A study of patients' experiences. *Nursing Ethics*, *27*(4), 1089-1102.

<https://doi.org/10.1177/0969733019874497>

Roshanzadeh, M., Vanaki, Z., & Sadooghiasl, A. (2020). Sensitivity in ethical decision-making: The experiences of nurse managers. *Nursing Ethics*, 27(5), 1174-1186.

<https://doi.org/10.1177/0969733019864146>

Roy, M., Bolton-Moore, C., Sikazwe, I., Mukumbwa-Mwenechanya, M., Efronson, E., Mwamba, C., Somwe, P., Kalunkumya, E., Lumpa, M., Sharma, A., Pry, J., Mutale, W., Ehrenkranz, P., Glidden, D. V., Padian, N., Topp, S., Geng, E., & Holmes, C. B. (2020). Participation in adherence clubs and on-time drug pickup among HIV-infected adults in Zambia: A matched-pair cluster randomized trial.

*PLoS Medicine*, 17(7), e1003116. <https://doi.org/10.1371/journal.pmed.1003116>

Rubio-Navarro, A., García-Capilla, D. J., Torralba-Madrid, M. J., & Rutty, J. (2020). Decision-making in an emergency department: A nursing accountability model. *Nursing Ethics*, 27(2), 567-586.

<https://doi.org/10.1177/0969733019851542>

Rushton, K., Fraser, C., Gellatly, J., Brooks, H., Bower, P., Armitage, C. J., Faija, C., Welsh, C., & Bee, P. (2019). A case of misalignment: the perspectives of local and national decision-makers on the implementation of psychological treatment by telephone in the Improving Access to Psychological Therapies Service. *BMC Health Services Research*, 19(1), 997. [https://doi.org/10.1186/s12913-019-](https://doi.org/10.1186/s12913-019-4824-4)

[4824-4](https://doi.org/10.1186/s12913-019-4824-4)

Sabone, M., Mazonde, P., Cainelli, F., Maitshoko, M., Joseph, R., Shayo, J., Morris, B., Muecke, M., Mann Wall, B., Hoke, L., Peng, L., Mooney-Doyle, K., & Ulrich, C. M. (2020). Everyday ethical challenges of nurse-physician collaboration. *Nursing Ethics*, 27(1), 206-220.

<https://doi.org/10.1177/0969733019840753>

Saei Ghare Naz, M., Ramezani Tehrani, F., Ahmadi, F., Alavi Majd, H., & Ozgoli, G. (2019). Threats to Feminine Identity as the Main Concern of Iranian Adolescents with Polycystic Ovary Syndrome: A Qualitative Study. *Journal of Pediatric Nursing*, 49, e42-e47.

<https://doi.org/10.1016/j.pedn.2019.08.010>

Salberg, J., Bäckström, J., Röing, M., & Öster, C. (2019). Ways of understanding nursing in psychiatric inpatient care - A phenomenographic study. *Journal of Nursing Management*, 27(8), 1826-1834.

<https://doi.org/10.1111/jonm.12882>

Saleh, M. Y. N., Al-Amer, R., Al Ashram, S. R., Dawani, H., & Randall, S. (2020). Exploring the lived experience of Jordanian male nurses: A phenomenological study. *Nursing Outlook*, 68(3), 313-323.

<https://doi.org/10.1016/j.outlook.2019.10.007>

Salehi, Z., Najafi Ghezalje, T., Hajibabae, F., & Joolae, S. (2020). Factors behind ethical dilemmas regarding physical restraint for critical care nurses. *Nursing Ethics*, 27(2), 598-608.

<https://doi.org/10.1177/0969733019858711>

Saranrittichai, K., Ussavapark, W., Thamrongwarangkoon, A., Haengsorn, T., Daoruang, S., & Teeranut, A. (2020). Community- Based Approaches to Cancer Prevention in Rural Thailand Based on Experiences of Accredited Health Professionals. *Asian Pacific Journal of Cancer Prevention*, 21(1), 7-12. <https://doi.org/10.31557/apjcp.2020.21.1.7>

Sebayang, S. K., Dewi, D., Lailiyah, S., & Ahsan, A. (2019). Mixed-methods evaluation of a ban on tobacco advertising and promotion in Banyuwangi District, Indonesia. *Tobacco Control*, 28(6), 651-656. <https://doi.org/10.1136/tobaccocontrol-2018-054443>

Seidlein, A. H., Buchholz, I., Buchholz, M., & Salloch, S. (2020). Concepts of health in long-term home care: An empirical-ethical exploration. *Nursing Ethics*, 27(5), 1187-1200.

<https://doi.org/10.1177/0969733019868277>

Seki, M., Fujinuma, Y., Matsushima, M., Joki, T., Okonogi, H., Miura, Y., & Ohno, I. (2019). How a problem-based learning approach could help Japanese primary care physicians: a qualitative study. *International Journal of Medical Education*, 10, 232-240. <https://doi.org/10.5116/ijme.5de7.99c7>

Semple, C. J., Rutherford, H., Killough, S., Moore, C., & McKenna, G. (2019). Long-term impact of living with an obturator following a maxillectomy: A qualitative study. *Journal of Dentistry*, *90*, 103212. <https://doi.org/10.1016/j.jdent.2019.103212>

Shahabuddin, A. S. M., A. B. S., Jackson, D., Rutter, P., Hasman, A., & Sarker, M. (2020). Carrying out embedded implementation research in humanitarian settings: A qualitative study in Cox's Bazar, Bangladesh. *PLoS Medicine*, *17*(7), e1003148. <https://doi.org/10.1371/journal.pmed.1003148>

Sim, M. A., Lee, S. H., Phan, P. H., & Lateef, A. (2020). Quality improvement at an acute medical unit in an Asian Academic Center: A mixed methods study of nursing work dynamics. *Nursing Outlook*, *68*(2), 169-183. <https://doi.org/10.1016/j.outlook.2019.09.002>

Skelton, T., Irakoze, A., Bould, M. D., Przybylak-Brouillard, A., Twagirumugabe, T., & Livingston, P. (2020). Retention and Migration of Rwandan Anesthesiologists: A Qualitative Study. *Anesthesia & Analgesia*, *131*(2), 605-612. <https://doi.org/10.1213/ane.0000000000004794>

Srinivasan, M., Asch, S., Vilendrer, S., Thomas, S. C., Bajra, R., Barman, L., Edwards, L. M., Filipowicz, H., Giang, L., Jee, O., Mahoney, M., Nelligan, I., Jayant Phadke, A., Torres, E., & Artandi, M. (2020). Qualitative Assessment of Rapid System Transformation to Primary Care Video Visits at an Academic Medical Center. *Annals of Internal Medicine*, *173*(7), 527-535. <https://doi.org/10.7326/m20-1814>

Strömbäck, M., Fjellman-Wiklund, A., Keisu, S., Stureson, M., & Eskilsson, T. (2020). Restoring confidence in return to work: A qualitative study of the experiences of persons with exhaustion disorder after a dialogue-based workplace intervention. *PLoS One*, *15*(7), e0234897. <https://doi.org/10.1371/journal.pone.0234897>

Symanski, E., An Han, H., Hopkins, L., Smith, M. A., McCurdy, S., Han, I., Jimenez, M., Markham, C., Richner, D., James, D., & Flores, J. (2020). Metal air pollution partnership solutions: building an academic-government-community-industry collaboration to improve air quality and health in

environmental justice communities in Houston. *Environmental Health*, 19(1), 39.

<https://doi.org/10.1186/s12940-020-00590-1>

Timberlake, D. S., Laitinen, U., Kinnunen, J. M., & Rimpela, A. H. (2020). Strategies and barriers to achieving the goal of Finland's tobacco endgame. *Tobacco Control*, 29(4), 398-404.

<https://doi.org/10.1136/tobaccocontrol-2018-054779>

Tompkins, C. N. E., Burnley, A., McNeill, A., & Hitchman, S. C. (2020). Factors that influence smokers' and ex-smokers' use of IQOS: a qualitative study of IQOS users and ex-users in the UK. *Tobacco*

*Control*. <https://doi.org/10.1136/tobaccocontrol-2019-055306>

Urquhart, R., Kendell, C., Cornelissen, E., Madden, L. L., Powell, B. J., Kissmann, G., Richmond, S. A., Willis, C., & Bender, J. L. (2020). Defining sustainability in practice: views from implementing real-world innovations in health care. *BMC Health Services Research*, 20(1), 87.

<https://doi.org/10.1186/s12913-020-4933-0>

Vanstone, M., Neville, T. H., Clarke, F. J., Swinton, M., Sadik, M., Takaoka, A., Smith, O., Baker, A. J., LeBlanc, A., Foster, D., Dhingra, V., Phung, P., Xu, X., Kao, Y., Heels-Ansdell, D., Tam, B., Toledo, F., Boyle, A., & Cook, D. J. (2020). Compassionate End-of-Life Care: Mixed-Methods Multisite Evaluation of the 3 Wishes Project. *Annals of Internal Medicine*, 172(1), 1-11. [https://doi.org/10.7326/m19-](https://doi.org/10.7326/m19-2438)

[2438](https://doi.org/10.7326/m19-2438)

Voogt, J. J., Kars, M. C., van Rensen, E. L. J., Schneider, M. M. E., Noordegraaf, M., & van der Schaaf, M. F. (2020). Why Medical Residents Do (and Don't) Speak Up About Organizational Barriers and Opportunities to Improve the Quality of Care. *Academic Medicine*, 95(4), 574-581.

<https://doi.org/10.1097/acm.0000000000003014>

Vos, J., Franklin, B. D., Chumbley, G., Galal-Edeen, G. H., Furniss, D., & Blandford, A. (2020). Nurses as a source of system-level resilience: Secondary analysis of qualitative data from a study of

intravenous infusion safety in English hospitals. *International Journal of Nursing Studies*, 102, 103468. <https://doi.org/10.1016/j.ijnurstu.2019.103468>

Walburn, J., Anderson, R., & Morgan, M. (2020). Forms, interactions, and responses to social support: A qualitative study of support and adherence to photoprotection amongst patients with Xeroderma Pigmentosum. *British Journal of Health Psychology*, 25(1), 89-106. <https://doi.org/10.1111/bjhp.12396>

Warner, N. S., Finnie, D., Warner, D. O., Hooten, W. M., Mauck, K. F., Cunningham, J. L., Gazelka, H., Bydon, M., Huddleston, P. M., & Habermann, E. B. (2020). The System Is Broken: A Qualitative Assessment of Opioid Prescribing Practices After Spine Surgery. *Mayo Clinic Proceedings*, 95(9), 1906-1915. <https://doi.org/10.1016/j.mayocp.2020.02.027>

Weller, C. D., Richards, C., Turnour, L., Patey, A. M., Russell, G., & Team, V. (2020). Barriers and enablers to the use of venous leg ulcer clinical practice guidelines in Australian primary care: A qualitative study using the theoretical domains framework. *International Journal of Nursing Studies*, 103, 103503. <https://doi.org/10.1016/j.ijnurstu.2019.103503>

Wheeler, M., de Bourmont, S., Paul-Emile, K., Pfeffinger, A., McMullen, A., Critchfield, J. M., & Fernandez, A. (2019). Physician and Trainee Experiences With Patient Bias. *JAMA Internal Medicine*, 179(12), 1678-1685. <https://doi.org/10.1001/jamainternmed.2019.4122>

Womack, D. M., Vuckovic, N. N., Steege, L. M., Eldredge, D. H., Hribar, M. R., & Gorman, P. N. (2019). Subtle cues: Qualitative elicitation of signs of capacity strain in the hospital workplace. *Applied Ergonomics*, 81, 102893. <https://doi.org/10.1016/j.apergo.2019.102893>

Zhao, Y., Zhao, X., Liu, Y., Wei, Y., Jin, G., Shao, S., & Lu, X. (2019). Perceptions, behaviours, barriers and needs of evidence-based medicine in primary care in Beijing: a qualitative study. *BMC Family Practice*, 20(1), 171. <https://doi.org/10.1186/s12875-019-1062-0>
